# Supplementary material
Source: PubMed Central journal article supplement (PMC11639017)
Supplement: sj-pdf-1-jrs-10.1177_01410768241288345.pdf [file sj-pdf-1-jrs-10.1177_01410768241288345.pdf]

## **SUPPLEMENTARY MATERIAL**

Supplementary methods

Table S1. SNOMED and ICD-10 codes to identify patients with Long COVID in the national dataset

Table S2. Unit Cost

Figure S1. Trajectory and healthcare utilisation for the long COVID study population

Figure S2. Total GP/OP/IP/ED consultations/visits over time among people with Long COVID since diagnosis

Figure S3. Number of Long COVID patients who consulted/visited GP/OP/IP/ED over time since diagnosis

## **SUPPLEMENTARY MATERIAL**

### **Supplementary methods**

*Outpatient:* In order to focus our analyses, for outpatient consultations, we concentrated on high-frequency specialties for Long COVID patient referral: Respiratory medicine service, Physiotherapy service, Cardiology service, Diagnostic imaging service, Trauma and orthopaedic service, Ophthalmology service, Gynaecology service, Ear nose and throat service, Rheumatology service, Dermatology service, Gastroenterology service, Urology service, Clinical haematology service, Clinical haematology service, Neurology service, General surgery service, Midwifery service, Obstetrics service, General internal medicine service, Respiratory physiology service, Pain management service, and the treatment specialty code for Post COVID syndrome service (348) from 1 April 2021 (although there was no corresponding cost).

*Outpatient (OP) and inpatient (IP):* Due to the large amount of tests and procedures conducted for OP and IP patients, we only investigated the most common in those with Long COVID: for both OP and IP, CTPA, TTE, CT head, MRI brain; for IP only, ‘fiberoptic endoscopic examination of upper gastrointestinal tract and biopsy of lesion of upper gastrointestinal tract’, ‘unspecified diagnostic fiberoptic endoscopic examination of upper gastrointestinal tract’, ‘diagnostic fiberoptic endoscopic examination of colon and biopsy of lesion of colon’, ‘unspecified diagnostic endoscopic examination of colon’.

Table S1. SNOMED and ICD-10 codes to identify patients with Long COVID in the national dataset

| Code             | Term                                                                                  | Source                                   |
|------------------|---------------------------------------------------------------------------------------|------------------------------------------|
| 1325161000000102 | Post-COVID-19 syndrome                                                                | 15 SNOMED codes(21)                      |
| 1325181000000106 | Ongoing symptomatic disease caused by severe acute respiratory syndrome coronavirus 2 |                                          |
| 1325021000000106 | Signposting to Your COVID Recovery                                                    |                                          |
| 1325031000000108 | Referral to post-COVID assessment clinic                                              |                                          |
| 1325041000000104 | Referral to Your COVID Recovery rehabilitation platform                               |                                          |
| 1325051000000101 | Newcastle post-COVID syndrome Follow-up Screening Questionnaire                       |                                          |
| 1325061000000103 | Assessment using Newcastle post-COVID syndrome Follow-up Screening Questionnaire      |                                          |
| 1325071000000105 | COVID-19 Yorkshire Rehabilitation Screening tool                                      |                                          |
| 1325081000000107 | Assessment using COVID-19 Yorkshire Rehabilitation Screening tool                     |                                          |
| 1325091000000109 | Post-COVID-19 Functional Status Scale patient self-report                             |                                          |
| 1325101000000101 | Assessment using Post-COVID-19 Functional Status Scale patient self-report            |                                          |
| 1325121000000105 | Post-COVID-19 Functional Status Scale patient self-report final scale grade           |                                          |
| 1325131000000107 | Post-COVID-19 Functional Status Scale structured interview final scale grade          |                                          |
| 1325141000000103 | Assessment using Post-COVID-19 Functional Status Scale structured interview           |                                          |
| 1325151000000100 | Post-COVID-19 Functional Status Scale structured interview                            |                                          |
|                  |                                                                                       |                                          |
| 1119303003       | Post-acute COVID-19 (disorder)                                                        | More codes from NHS SNOMED search engine |
| 1325831000000100 | Post-COVID-19 syndrome service (qualifier value)                                      |                                          |
| 1119304009       | Chronic post-COVID-19 syndrome (disorder)                                             |                                          |
| 1326351000000108 | Post-COVID-19 syndrome resolved (finding)                                             |                                          |
| 1326321000000103 | Post-COVID assessment service simple reference set (foundation metadata concept)      |                                          |
|                  |                                                                                       |                                          |
| U074             | Post COVID-19 condition                                                               | ICD-10                                   |

Table S2. Unit Cost

| Category                                                   | Cost (£)<br>(before / after<br>inflation) | Source of Cost                               | Year of the cost | Inflation<br>rate <sup>2</sup> |
|------------------------------------------------------------|-------------------------------------------|----------------------------------------------|------------------|--------------------------------|
| <b>GP consultations<br/>(non-prescription)<sup>1</sup></b> | 33 / 34                                   | Unit cost of health and<br>social care staff | 2020/21          | 1.0272                         |
| <b>Outpatient<br/>appointments</b>                         |                                           |                                              |                  |                                |
| 340 - Respiratory<br>medicine service                      | 209 / 215                                 | national tariff 2020-2021                    | 2020/21          | 1.0272                         |
| 650 - Physiotherapy<br>service                             | 119 / 122                                 | national tariff 2020-2021                    | 2020/21          | 1.0272                         |
| 320 - Cardiology<br>service                                | 191 / 196                                 | national tariff 2020-2021                    | 2020/21          | 1.0272                         |
| 812 - Diagnostic<br>imaging service                        | 50 / 51                                   | national tariff 2020-2021                    | 2020/21          | 1.0272                         |
| 110 - Trauma and<br>orthopaedic service                    | 187 / 192                                 | national tariff 2020-2021                    | 2020/21          | 1.0272                         |
| 130 - Ophthalmology<br>service                             | 168 / 173                                 | national tariff 2020-2021                    | 2020/21          | 1.0272                         |
| 502 - Gynaecology<br>service                               | 205 / 211                                 | national tariff 2020-2021                    | 2020/21          | 1.0272                         |
| 120 - Ear nose and<br>throat service                       | 172 / 177                                 | national tariff 2020-2021                    | 2020/21          | 1.0272                         |
| 410 - Rheumatology<br>service                              | 175 / 180                                 | national tariff 2020-2021                    | 2020/21          | 1.0272                         |
| 330 - Dermatology<br>service                               | 168 / 173                                 | national tariff 2020-2021                    | 2020/21          | 1.0272                         |
| 301 -<br>Gastroenterology<br>service                       | 165 / 169                                 | national tariff 2020-2021                    | 2020/21          | 1.0272                         |
| 101 - Urology service                                      | 144 / 148                                 | national tariff 2020-2021                    | 2020/21          | 1.0272                         |
| 303 - Clinical<br>haematology service                      | 193 / 198                                 | national tariff 2020-2021                    | 2020/21          | 1.0272                         |
| 400 - Neurology<br>service                                 | 206 / 212                                 | national tariff 2020-2021                    | 2020/21          | 1.0272                         |
| 100 - General<br>surgery service                           | 180 / 185                                 | national tariff 2020-2021                    | 2020/21          | 1.0272                         |
| 560 - Midwifery<br>service                                 | 118 / 121                                 | national tariff 2020-2021                    | 2020/21          | 1.0272                         |
| 501 - Obstetrics<br>service                                | 186 / 191                                 | national tariff 2020-2021                    | 2020/21          | 1.0272                         |
| 300 - General internal<br>medicine service                 | 211 / 217                                 | national tariff 2020-2021                    | 2020/21          | 1.0272                         |
| 341 - Respiratory<br>physiology service                    | 159 / 163                                 | national tariff 2020-2021                    | 2020/21          | 1.0272                         |
| 191 - Pain<br>management service                           | 238 / 244                                 | national tariff 2020-2021                    | 2020/21          | 1.0272                         |
| CTPA (U35.4)                                               | 120 / 136                                 | (31)                                         | 2015             | 1.1294                         |
| TTE (U20.1)                                                | 79 / 90                                   | (32)                                         | 2014             | 1.1338                         |
| CT head (U05.1) <sup>3</sup>                               | 99 / 102                                  | national tariff 2020-2021                    | 2020/21          | 1.0272                         |
| MRI Brain (U05.2) <sup>4</sup>                             | 176 / 181                                 | national tariff 2020-2021                    | 2020/21          | 1.0272                         |

|                                                               |             |                           |                             |        |
|---------------------------------------------------------------|-------------|---------------------------|-----------------------------|--------|
| <b>Hospital admissions</b>                                    |             |                           |                             |        |
| <b>Days in hospital (general ward)</b>                        | 587 / 650   | (23)                      | 2016/17                     | 1.1066 |
| CTPA (U35.4)                                                  | 120 / 136   | (31)                      | 2015                        | 1.1294 |
| TTE (U20.1)                                                   | 79 / 90     | (32)                      | 2014                        | 1.1338 |
| G45.1 <sup>5</sup>                                            | 197 / 215   | (33)                      | NHS reference costs 2017/18 | 1.0929 |
| G45.9 <sup>6</sup>                                            | 277 / 303   | (33)                      | NHS reference costs 2017/18 | 1.0929 |
| H22.1 <sup>7</sup>                                            | 277 / 303   | (33)                      | NHS reference costs 2017/18 | 1.0929 |
| H22.9 <sup>8</sup>                                            | 206 / 225   | (33)                      | NHS reference costs 2017/18 | 1.0929 |
| CT head (U05.1)                                               | 99 / 102    | national tariff 2020-2021 | 2020/21                     | 1.0272 |
| MRI Brain (U05.2)                                             | 176 / 181   | national tariff 2020-2021 | 2020/21                     | 1.0272 |
| <b>Days in critical care (2-3 organs support)<sup>9</sup></b> | 2552 / 2621 | National tariff 2020-2021 | NHS reference costs 2020/21 | 1.0272 |
| <b>ED attendance</b>                                          | 269 / 276   | Mean of all ED categories | NHS reference costs 2020/21 | 1.0272 |

<sup>1</sup> Cost per surgery lasting 9.22 minutes – GP (including direct care).

<sup>2</sup>Source of inflation: The NHS cost inflation index, from Unit Costs of Health and Social Care 2022 Manual

<https://kar.kent.ac.uk/100519/1/Unit%20Costs%20of%20health%20and%20Social%20Care%202022%20%28amended%2013%20July%202023%29.pdf>

<sup>3</sup>We used the cost for 'Computerised Tomography Scan of One Area, without Contrast, 19 years and over'.

<sup>4</sup>We used the cost for 'Magnetic Resonance Imaging Scan of One Area, without Contrast, 19 years and over'.

<sup>5</sup>OPCS code for Fiberoptic endoscopic examination of upper gastrointestinal tract and biopsy of lesion of upper gastrointestinal tract.

<sup>6</sup>OPCS code for unspecified diagnostic fiberoptic endoscopic examination of upper gastrointestinal tract.

<sup>7</sup>OPCS code for diagnostic fiberoptic endoscopic examination of colon and biopsy of lesion of colon.

<sup>8</sup>OPCS code for unspecified diagnostic endoscopic examination of colon.

<sup>9</sup>In HES CC data, we could only observe the maximum number of organs supported, and not the duration of maximum number of organ support. Thus, we used cost for 2-3 organ support as the proxy for average cost in CC. We averaged over 'Adult Critical Care, 2 Organs Supported' (service code – CCU01; currency code - XC05Z, national average unit cost - £2,491.23) and 'Adult Critical Care, 3 Organs Supported' (service code – CCU01; currency code - XC04Z, National average unit cost - £2,612.99) in 'Non-specific, general adult critical care patients predominate'.

Table S3. Overlap between control groups

| <b>Control A</b>  | <b>Control B</b>       | <b>Overlap %</b> |
|-------------------|------------------------|------------------|
| Pre-LC            | Pre-pandemic           | 1.3 <sup>2</sup> |
| Pre-LC            | Contemporary non-COVID | 0 <sup>1</sup>   |
| Pre-LC            | COVID only, no LC      | 0 <sup>1</sup>   |
| COVID only, no LC | Pre-pandemic           | 6.3 <sup>2</sup> |
| COVID only, no LC | Contemporary non-COVID | 0 <sup>1</sup>   |
| Pre-pandemic      | Contemporary non-COVID | 8.4 <sup>2</sup> |

<sup>1</sup> Mutually exclusive groups were with 0% overlap.

<sup>2</sup> Non-mutually exclusive groups were with small overlap ranging 1%-8%.

Figure S1. Trajectory and healthcare utilisation for the long COVID study population

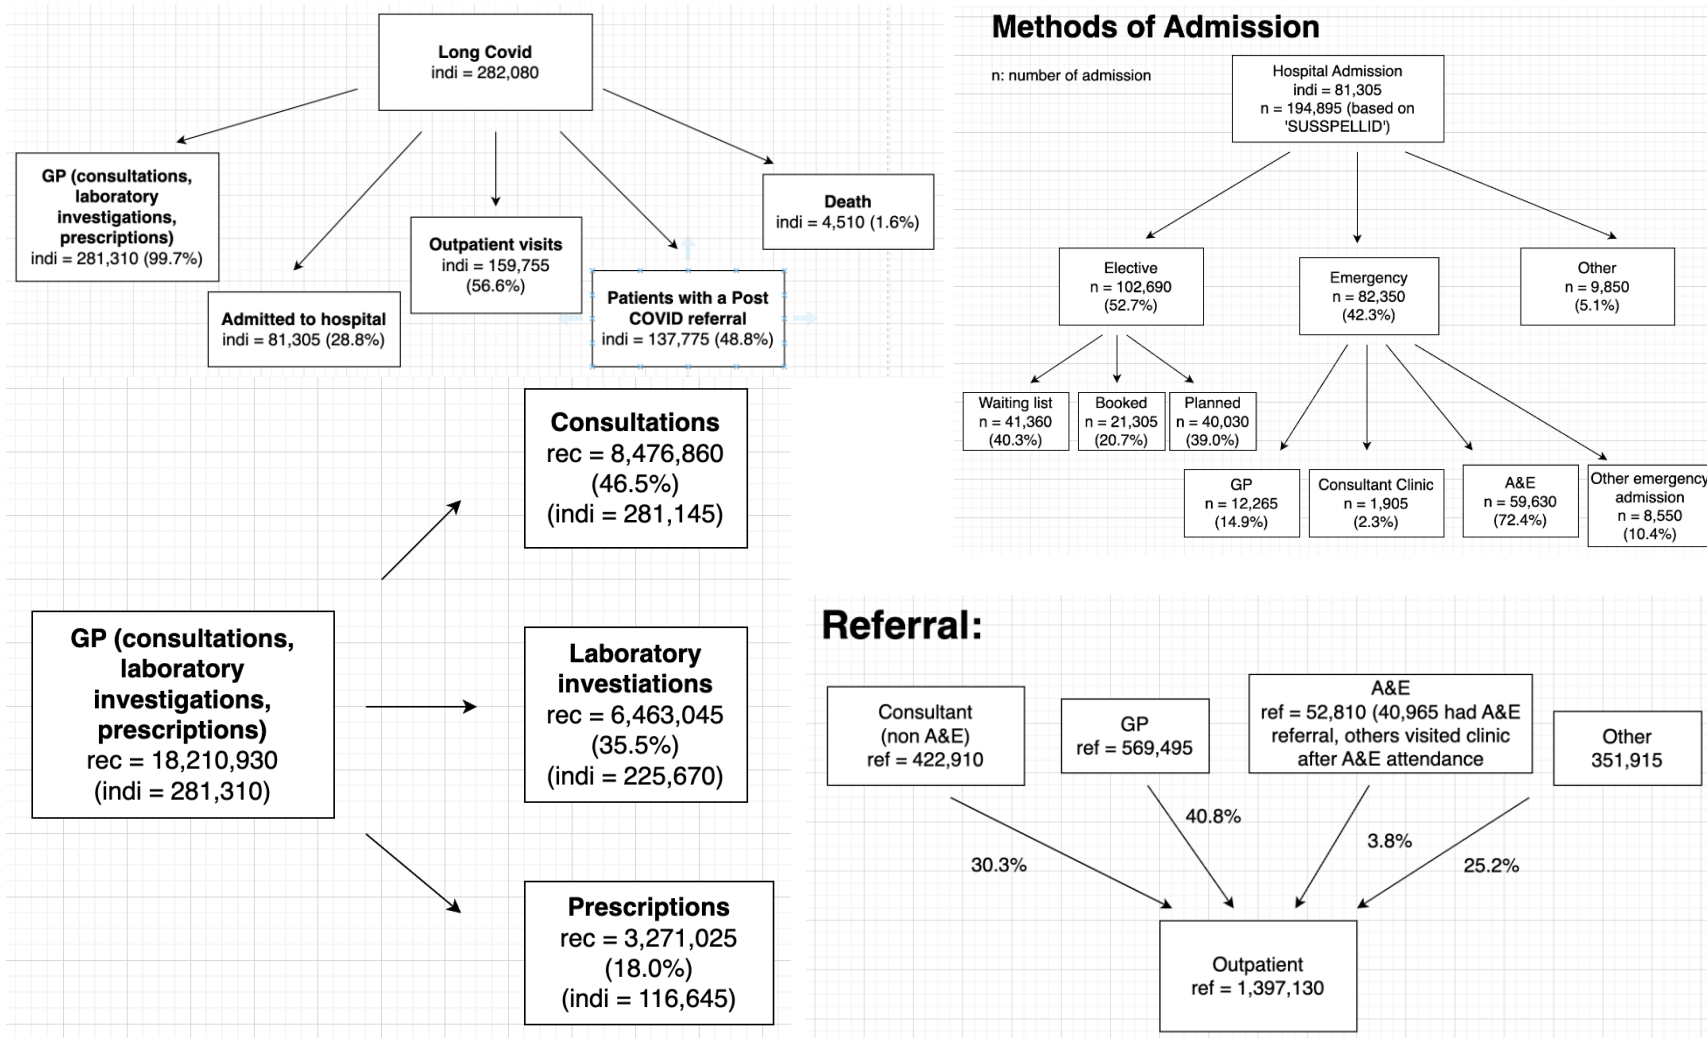

GP: General Practice; A&E is equivalent to Emergency Department

Figure S2. Total GP/OP/IP/ED consultations/visits over time among people with Long COVID since diagnosis

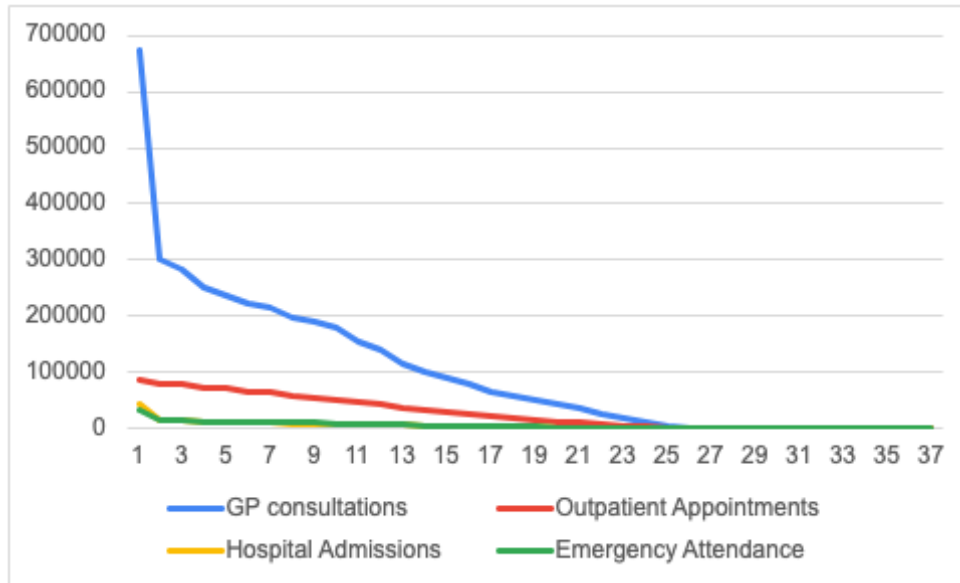

GP: General Practice; OP: Outpatient; IP: Inpatient; ED: Emergency Department



Figure S3. Number of Long COVID patients who consulted / visited GP/OP/IP/ED over time since diagnosis

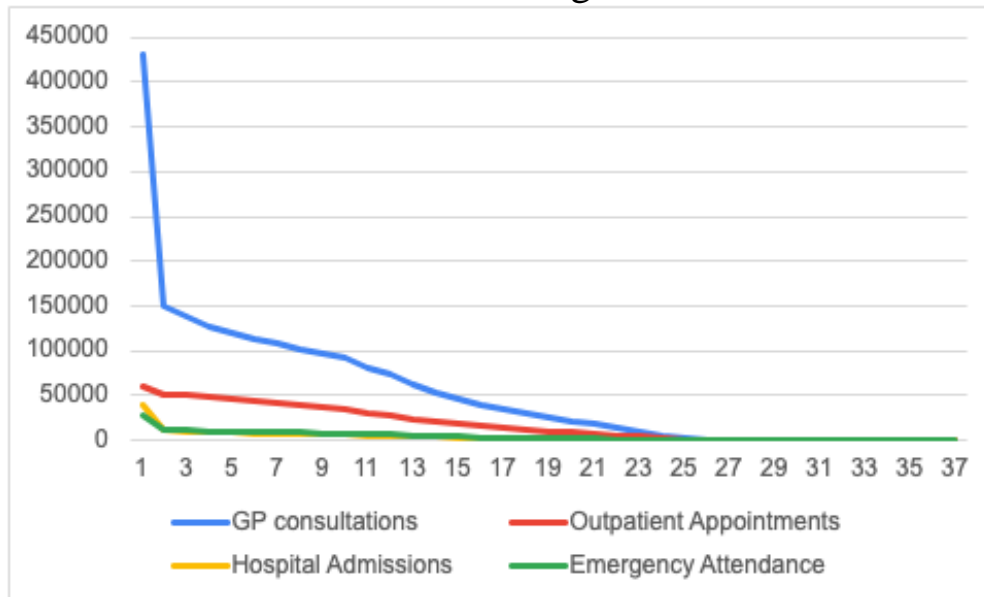

GP: General Practice; OP: Outpatient; IP: Inpatient; ED: Emergency Department
